# Supplementary material for: PTPRD silencing by DNA hypermethylation decreases insulin receptor signaling and leads to type 2 diabetes
Source: PubMed Central journal article supplement (PMC4536994; doi:10.18632/oncotarget.4092), 2015-05-25
Supplement: oncotarget-06-12997-s001.pdf [file oncotarget-06-12997-s001.pdf]

## SUPPLEMENTARY TABLES

**Supplementary Table S1. Genotypic and allelic frequencies of DNMT1 genetic polymorphisms in T2D patients and controls**

|                         |    | Type 2 diabetes | Healthy control | <i>P</i> | OR (95% CI)         |
|-------------------------|----|-----------------|-----------------|----------|---------------------|
| Genotype frequency      |    | N (%)           | N (%)           |          |                     |
| rs78789647              | TT | 10 (0.52)       | 10 (0.28)       |          | 1.921 (0.798–4.626) |
|                         | TC | 271 (14.09)     | 435 (12.08)     | 0.035*   | 1.197 (1.017–1.409) |
|                         | CC | 1643 (85.4)     | 3157 (87.65)    |          | 1                   |
| s16999593               | CC | 106 (5.51)      | 171 (4.8)       |          | 1.110 (0.862–1.428) |
|                         | CT | 610 (31.7)      | 1226 (34.4)     | 0.088    | 0.891 (0.790–1.004) |
|                         | TT | 1208 (62.79)    | 2163 (60.76)    |          | 1                   |
| rs2114724               | TT | 144 (7.48)      | 306 (8.5)       |          | 0.833 (0.674–1.031) |
|                         | TC | 754 (39.17)     | 1477 (41.00)    | 0.100    | 0.904 (0.805–1.016) |
|                         | CC | 1027 (53.35)    | 1819 (50.50)    |          | 1                   |
| rs7253062               | AA | 122 (6.34)      | 198 (5.50)      |          | 1.181 (0.932–1.497) |
|                         | AG | 699 (36.35)     | 1290 (35.82)    | 0.359    | 1.039 (0.924–1.168) |
|                         | GG | 1102 (57.31)    | 2113 (58.68)    |          | 1                   |
| <b>Allele frequency</b> |    |                 |                 |          |                     |
| rs78789647              | T  | 291 (7.56)      | 455 (6.32)      | 0.013*   | 1.213 (1.042–1.414) |
|                         | C  | 3557 (92.44)    | 6749 (93.68)    |          | 1                   |
| rs16999593              | C  | 822 (21.36)     | 1568 (22.02)    | 0.424    | 0.962 (0.874–1.058) |
|                         | T  | 3026 (78.64)    | 5552 (77.98)    |          | 1                   |
| rs2114724               | T  | 1042 (27.06)    | 2089 (29.00)    | 0.032    | 0.909 (0.833–0.992) |
|                         | C  | 2808 (72.94)    | 5115 (71.00)    |          | 1                   |
| rs7253062               | A  | 943 (24.52)     | 1686 (23.41)    | 0.192    | 1.063 (0.970–1.165) |
|                         | G  | 2903 (75.48)    | 5516 (76.59)    |          | 1                   |

CI, confidence interval; OR, odds ratio.

\*Genotype distribution between patients and control were calculated by  $2 \times 3$  chisquare test.

**Supplementary Table S2. Genotypic and allelic frequencies of DNMT3A genetic polymorphisms in T2D patients and controls**

|                    |    | Type 2 diabetes | Healthy control | <i>P</i> | OR (95% CI)         |
|--------------------|----|-----------------|-----------------|----------|---------------------|
| Genotype frequency |    | N (%)           | N (%)           |          |                     |
| rs11887120         | CC | 460 (23.93)     | 889 (24.70)     |          | 0.890 (0.762–1.041) |
|                    | CT | 943 (49.06)     | 1817 (50.49)    | 0.206    | 0.893 (0.781–1.021) |
|                    | TT | 519 (27.00)     | 893 (24.81)     |          | 1                   |
| rs11892646         | TT | 163 (8.49)      | 336 (9.33)      |          | 0.894 (0.730–1.095) |
|                    | TC | 788 (41.06)     | 1481 (41.13)    | 0.556    | 0.981 (0.873–1.102) |
|                    | CC | 968 (50.44)     | 1784 (49.54)    |          | 1                   |
| rs12987103         | TT | 104 (5.40)      | 184 (5.11)      |          | 1.092 (0.850–1.404) |
|                    | TC | 695 (36.10)     | 1238 (34.41)    | 0.358    | 1.085 (0.965–1.220) |
|                    | CC | 1126 (58.49)    | 2176 (60.48)    |          | 1                   |
| rs12991495         | CC | 22 (1.14)       | 41 (1.14)       |          | 0.997 (0.592–1.679) |
|                    | CT | 318 (16.54)     | 620 (17.21)     | 0.816    | 0.953 (0.822–1.105) |
|                    | TT | 1583 (82.32)    | 2941 (81.65)    |          | 1                   |
| rs13428812         | GG | 109 (5.66)      | 204 (5.66)      |          | 1.026 (0.804–1.309) |
|                    | GA | 728 (37.82)     | 1309 (36.34)    | 0.544    | 1.068 (0.950–1.200) |
|                    | AA | 1088 (56.52)    | 2089 (58.00)    |          | 1                   |
| rs1465825          | CC | 289 (15.02)     | 562 (15.61)     |          | 0.889 (0.752–1.052) |
|                    | CT | 888 (46.15)     | 1746 (48.50)    | 0.097    | 0.880 (0.779–0.993) |
|                    | TT | 747 (38.83)     | 1292 (35.89)    |          | 1                   |
| rs6711622          | AA | 82 (4.28)       | 136 (3.78)      |          | 1.166 (0.878–1.546) |
|                    | AG | 640 (33.37)     | 1153 (32.02)    | 0.339    | 1.073 (0.952–1.209) |
|                    | GG | 1196 (62.36)    | 2312 (64.20)    |          | 1                   |
| rs6722613          | AA | 219 (11.38)     | 400 (11.11)     |          | 1.032 (0.858–1.240) |
|                    | AG | 831 (43.17)     | 1552 (43.10)    | 0.945    | 1.009 (0.897–1.135) |
|                    | GG | 875 (45.45)     | 1649 (45.79)    |          | 1                   |
| rs7575625          | GG | 99 (5.16)       | 183 (5.08)      |          | 1.056 (0.818–1.362) |
|                    | GA | 700 (36.50)     | 1234 (34.27)    | 0.234    | 1.107 (0.984–1.245) |
|                    | AA | 1119 (58.34)    | 2184 (60.65)    |          | 1                   |
| rs7586294          | CC | 263 (13.68)     | 473 (13.14)     |          | 1.080 (0.907–1.285) |
|                    | CT | 902 (46.91)     | 1655 (45.97)    | 0.554    | 1.058 (0.939–1.193) |
|                    | TT | 758 (39.42)     | 1472 (40.89)    |          | 1                   |
| rs7587636          | AA | 196 (10.22)     | 353 (9.80)      | 0.673    | 1.069 (0.882–1.295) |
|                    | AG | 810 (42.23)     | 1492 (41.43)    |          | 1.045 (0.930–1.175) |

(Continued)

|                  |    | Type 2 diabetes | Healthy control | <i>P</i> | OR (95% CI)         |
|------------------|----|-----------------|-----------------|----------|---------------------|
|                  | GG | 912 (47.55)     | 1756 (48.76)    |          | 1                   |
| rs7594432        | TT | 434 (22.59)     | 857 (23.79)     |          | 0.872 (0.746–1.019) |
|                  | TC | 934 (48.62)     | 1793 (49.78)    | 0.160    | 0.897 (0.786–1.023) |
|                  | CC | 553 (28.79)     | 952 (26.43)     |          | 1                   |
| rs77993651       | AA | 93 (4.83)       | 181 (5.03)      |          | 0.943 (0.727–1.224) |
|                  | AG | 666 (34.62)     | 1278 (35.52)    | 0.725    | 0.957 (0.851–1.076) |
|                  | GG | 1165 (60.55)    | 2139 (59.45)    |          | 1                   |
|                  |    |                 |                 |          |                     |
| Allele frequency |    | N (%)           | N (%)           |          |                     |
| rs11887120       | C  | 1863 (48.47)    | 3595 (49.94)    | 0.139    | 0.943 (0.872–1.019) |
|                  | T  | 1981 (51.53)    | 3603 (50.06)    |          | 1                   |
| rs11892646       | T  | 1114 (29.03)    | 2153 (29.89)    | 0.341    | 0.959 (0.880–1.045) |
|                  | C  | 2724 (70.98)    | 5049 (70.11)    |          | 1                   |
| rs12987103       | T  | 903 (30.64)     | 1606 (28.73)    | 0.174    | 1.067 (0.972–1.170) |
|                  | C  | 2947 (76.55)    | 5590 (77.68)    |          | 1                   |
| rs12991495       | C  | 362 (9.41)      | 702 (9.74)      | 0.573    | 0.962 (0.842–1.100) |
|                  | T  | 3484 (90.59)    | 6502 (90.26)    |          | 1                   |
| rs13428812       | G  | 946 (24.57)     | 1717 (23.83)    | 0.388    | 1.041 (0.950–1.140) |
|                  | A  | 2904 (75.43)    | 5487 (76.17)    |          | 1                   |
| rs1465825        | C  | 1466 (38.10)    | 2870 (39.86)    | 0.071    | 0.929 (0.857–1.006) |
|                  | T  | 2382 (61.90)    | 4330 (60.14)    |          | 1                   |
| rs6711622        | A  | 804 (20.96)     | 1425 (19.79)    | 0.144    | 1.075 (0.976–1.184) |
|                  | G  | 3032 (79.04)    | 5777 (80.21)    |          | 1                   |
| rs6722613        | A  | 1269 (32.96)    | 2352 (32.66)    | 0.746    | 1.014 (0.933–1.102) |
|                  | G  | 2581 (67.04)    | 4850 (67.34)    |          | 1                   |
| rs7575625        | G  | 898 (23.41)     | 1600 (22.22)    | 0.154    | 1.070 (0.975–1.175) |
|                  | A  | 2938 (76.59)    | 5602 (77.78)    |          | 1                   |
| rs7586294        | C  | 1428 (37.13)    | 2601 (36.13)    | 0.296    | 1.044 (0.963–1.133) |
|                  | T  | 2418 (62.87)    | 4599 (63.87)    |          | 1                   |
| rs7587636        | A  | 1202 (31.33)    | 2198 (30.52)    | 0.377    | 1.039 (0.955–1.131) |
|                  | G  | 2634 (68.67)    | 5004 (69.48)    |          | 1                   |
| rs7594432        | T  | 1802 (46.90)    | 3507 (48.68)    | 0.075    | 0.931 (0.861–1.007) |
|                  | C  | 2040 (53.10)    | 3697 (51.32)    |          | 1                   |
| rs77993651       | A  | 852 (22.14)     | 1640 (22.79)    | 0.437    | 0.963 (0.877–1.058) |
|                  | G  | 2996 (77.86)    | 5556 (77.21)    |          | 1                   |

CI, confidence interval; OR, odds ratio.

<sup>a</sup>Genotype distribution between patients and control were calculated by  $2 \times 3$  chisquare test.

**Supplementary Table S3. Genotypic and allelic frequencies of DNMT3B genetic polymorphisms in T2D patients and controls**

|                         |    | Type 2 diabetes | Healthy control | <i>P</i> | OR (95% CI)          |
|-------------------------|----|-----------------|-----------------|----------|----------------------|
| Genotype frequency      |    | N (%)           | N (%)           |          |                      |
| rs4911262               | GG | 7 (0.36)        | 15 (0.42)       |          | 0.876 (0.356–2.152)  |
|                         | GA | 241 (12.53)     | 444 (12.33)     | 0.936    | 1.019 (0.861–1.204)  |
|                         | AA | 1675 (87.10)    | 3143 (87.26)    |          | 1                    |
| rs6058894               | TT | 7 (0.36)        | 12 (0.33)       |          | 1.092 (0.429–2.779)  |
|                         | TC | 239 (12.45)     | 450 (12.51)     | 0.981    | 0.994 (0.841–1.176)  |
|                         | CC | 1674 (87.19)    | 3134 (87.15)    |          | 1                    |
| rs6119954               | AA | 195 (10.16)     | 368 (10.22)     |          | 0.977 (0.806–1.183)  |
|                         | AG | 834 (43.44)     | 1591 (44.18)    | 0.843    | 0.966 (0.859–1.086)  |
|                         | GG | 891 (46.41)     | 1642 (45.60)    |          | 1                    |
| rs6141813               | GG | 282 (14.66)     | 509 (14.14)     |          | 1.022 (0.862–1.211)  |
|                         | GA | 865 (44.98)     | 1659 (46.10)    | 0.709    | 0.961 (0.853–1.084)  |
|                         | AA | 776 (40.35)     | 1431 (39.76)    |          | 1                    |
| <b>Allele frequency</b> |    |                 |                 |          |                      |
| rs4911262               | G  | 255 (6.63)      | 474 (6.58)      | 0.919    | 1.008 (0.861–1.180)  |
|                         | A  | 3591 (93.37)    | 6730 (93.52)    |          | 1                    |
| rs6058894               | T  | 253 (6.59)      | 474 (6.59)      | 0.997    | 0.9997 (0.854–1.171) |
|                         | C  | 3587 (93.41)    | 6718 (93.41)    |          | 1                    |
| rs6119954               | A  | 1224 (31.87)    | 2327 (32.31)    | 0.641    | 0.980 (0.901–1.066)  |
|                         | G  | 2616 (68.13)    | 4875 (67.69)    |          | 1                    |
| rs6141813               | G  | 1429 (37.16)    | 2677 (37.19)    | 0.971    | 0.998 (0.921–1.083)  |
|                         | A  | 2417 (62.84)    | 4521 (62.81)    |          | 1                    |

CI, confidence interval; OR, odds ratio.

<sup>a</sup>Genotype distribution between patients and control were calculated by  $2 \times 3$  chisquare test.

**Supplementary Table S4. Genotypic and allelic frequencies of DNMT3L genetic polymorphism in T2D patients and controls**

|                         |    | Type 2 diabetes | Healthy control | <i>P</i> | OR (95% CI)         |
|-------------------------|----|-----------------|-----------------|----------|---------------------|
| Genotype frequency      |    | N (%)           | N (%)           |          |                     |
| rs2838537               | GG | 73 (3.80)       | 121 (3.36)      |          | 1.168 (0.867–1.574) |
|                         | GT | 630 (32.78)     | 1121 (31.12)    | 0.270    | 1.088 (0.965–1.226) |
|                         | TT | 1219 (63.42)    | 2360 (65.52)    |          | 1                   |
| <b>Allele frequency</b> |    |                 |                 |          |                     |
| rs2838537               | G  | 776 (20.19)     | 1363 (18.92)    | 0.108    | 1.084 (0.982–1.196) |
|                         | T  | 3068 (79.81)    | 5841 (81.08)    |          | 1                   |

CI, confidence interval; OR, odds ratio.

<sup>a</sup>Genotype distribution between patients and control were calculated by 2 × 3 chisquare test.
